# Supplementary material for: Genome-wide identification and analysis of the YABBY gene family in Moso Bamboo (Phyllostachys edulis (Carrière) J. Houz)
Source: PeerJ. 2021 Jul 22;9:e11780. doi: 10.7717/peerj.11780 (PMC8310622; doi:10.7717/peerj.11780)
Supplement: Supplemental Information 1 — raw data [file peerj-09-11780-s001.xlsx]

## Sheet: Sheet1
Table The TPM value of YABBY gene expression pattern
ID	ID Rename	Leaf	Panicle	Rhizome	Root
PH02Gene42615.t2	PeYABBY01	8.48	1.12	4.375	0
PH02Gene08310.t1	PeYABBY03	56.15	20.08	14.61	0.17
PH02Gene41238.t1	PeYABBY02	0	0	0	0
PH02Gene30423.t1	PeYABBY04	13.7	1.43	2.61	0.06
PH02Gene17872.t1	PeYABBY05	0	0.76	0	0
PH02Gene42853.t1	PeYABBY06	47.625	64.285	13.205	0.72
PH02Gene18063.t1	PeYABBY07	11.83	1.6	3.015	0
PH02Gene21516.t2	PeYABBY08	81.235	111.445	17.76	0.295
PH02Gene35716.t2	PeYABBY09	3.645	9.755	4.34	2.36
PH02Gene11723.t1	PeYABBY11	4.645	16.215	0.63	0
PH02Gene30480.t1	PeYABBY10	59.62	54.975	40.285	0.31
PH02Gene29867.t1	PeYABBY13	12.455	26.11	2.005	0
PH02Gene30849.t1	PeYABBY12	35.79	34.025	31.335	0
PH02Gene09731.t1	PeYABBY14	24.225	1.455	6.395	0
PH02Gene02055.t1	PeYABBY16	16.885	1.425	4.06	0
PH02Gene16897.t1	PeYABBY15	6.815	3.94	1.75	0
